# Supplementary material for: DNA damage repair pathway alterations in metastatic clear cell renal cell carcinoma and implications on systemic therapy
Source: PubMed Central journal article supplement — J Immunother Cancer. 2020 Jun 21;8(1):e000230. doi: 10.1136/jitc-2019-000230 (PMC7311069; doi:10.1136/jitc-2019-000230), 2020-06-21
Supplement: jitc-2019-000230supp001.pdf [file jitc-2019-000230supp001.pdf]

# **DNA Damage Repair Pathway Alterations in Metastatic Clear Cell Renal Cell Carcinoma and Implications on Systemic Therapy**

## **Supplementary materials**

### **Table of Contents**

|                           |             |
|---------------------------|-------------|
| <b>eMethods</b> .....     | <b>2</b>    |
| <b>Table S1-S4</b> .....  | <b>3-7</b>  |
| <b>Figure S1-S5</b> ..... | <b>8-12</b> |

**eMethods:**

- Studied Gene list for DNA Repair Pathways:
  1. Base Excision Repair: *MUTYH, PARP1, POLE*
  2. Checkpoint: *ATM, ATR, CHEK1, CHEK2, MDC1*
  3. Fanconi anemia: *BLM, BRIP1, FANCA, FANCC, PALB2, RAD51C*
  4. Homologous Recombination Repair: *BRCA1, BRCA2, MRE11, NBN, RAD50, RAD51, RAD51B, RAD51D, RAD52, RAD54L, RECQL4*
  5. Nucleotide Excision Repair: *ERCC2, ERCC3, ERCC4, ERCC5*
  6. Mismatch Repair: *MLH1, MSH2, MSH6, PMS1, PMS2*

| <b>Table S1. Details of biopsy sites used in the study</b>                                                                          |                      |                      |                      |                        |                           |
|-------------------------------------------------------------------------------------------------------------------------------------|----------------------|----------------------|----------------------|------------------------|---------------------------|
| Biopsy details                                                                                                                      | All patients (n=229) | I/O analysis (n=107) | TKI analysis (n=118) | Deleterious DDR (n=43) | DDR Wild type/VUS (n=186) |
| Pre-treatment                                                                                                                       | 206 (90%)            | 94 (88%)             | 105 (89%)            | 37 (86%)               | 169 (91%)                 |
| Post-treatment                                                                                                                      | 23 (10%)             | 13 (12%)             | 13 (11%)             | 6 (14%)                | 17 (9%)                   |
| Primary                                                                                                                             | 140 (61%)            | 64 (60%)             | 75 (64%)             | 26 (61%)               | 114 (61%)                 |
| Metastatic site                                                                                                                     | 89 (39%)             | 43 (40%)             | 43 (36%)             | 17 (39%)               | 72 (39%)                  |
| Abbreviations: DDR; DNA Damage Repair. I/O; Immune-Oncology. TKI; Tyrosine Kinase Inhibitor. VUS; Variants of Unknown Significance. |                      |                      |                      |                        |                           |

**Table S2. Details of deleterious DDR gene alterations**

| Gene         | Alteration  | Type of mutation    | Germline or somatic | Pathway                         | FATHMM-MKL score for missense somatic mutation |
|--------------|-------------|---------------------|---------------------|---------------------------------|------------------------------------------------|
| <i>ATM</i>   | S2394Qfs*12 | Frameshift deletion | Somatic             | Checkpoint                      | -                                              |
| <i>ATM</i>   | G1522A      | Missense            | Somatic             | Checkpoint                      | 0.98211                                        |
| <i>ATM</i>   | G2024R      | Missense            | Somatic             | Checkpoint                      | 0.99101                                        |
| <i>ATM</i>   | G2496*      | Nonsense            | Somatic             | Checkpoint                      | -                                              |
| <i>ATM</i>   | K477Sfs*5   | Frameshift deletion | Somatic             | Checkpoint                      | -                                              |
| <i>ATM</i>   | L1194*      | Frameshift deletion | Somatic             | Checkpoint                      | -                                              |
| <i>ATM</i>   | N2646lfs*14 | Frameshift deletion | Somatic             | Checkpoint                      | -                                              |
| <i>ATM</i>   | Y1844*      | Nonsense            | Somatic             | Checkpoint                      | -                                              |
| <i>ATR</i>   | I1096M      | Missense            | Somatic             | Checkpoint                      | 0.85245                                        |
| <i>BLM</i>   | K167R       | Missense            | Somatic             | Fanconi Anemia                  | 0.88656                                        |
| <i>BRCA2</i> | K1964*      | Nonsense            | Somatic             | Homologous Recombination Repair | -                                              |
| <i>BRCA2</i> | N2781D      | Missense            | Somatic             | Homologous Recombination Repair | 1.0                                            |
| <i>BRCA2</i> | S1982Rfs*22 | Frameshift deletion | Germline            | Homologous Recombination Repair | -                                              |
| <i>CHEK1</i> | Q80H        | Missense            | Somatic             | Checkpoint                      | 0.95214                                        |
| <i>CHEK2</i> | Fusion      | Fusion              | Germline            | Checkpoint                      | -                                              |
| <i>CHEK2</i> | I157T       | Missense            | Germline            | Checkpoint                      | -                                              |
| <i>CHEK2</i> | I157T       | Missense            | Germline            | Checkpoint                      | -                                              |
| <i>CHEK2</i> | K255Sfs*20  | Frameshift deletion | Somatic             | Checkpoint                      | -                                              |
| <i>CHEK2</i> | K373N       | Missense            | Somatic             | Checkpoint                      | 0.92262                                        |
| <i>CHEK2</i> | L280*       | Frameshift deletion | Somatic             | Checkpoint                      | -                                              |
| <i>CHEK2</i> | S428F       | Missense            | Germline            | Checkpoint                      | -                                              |
| <i>CHEK2</i> | S428F       | Missense            | Germline            | Checkpoint                      | -                                              |
| <i>CHEK2</i> | T367Mfs*15  | Frameshift deletion | Germline            | Checkpoint                      | -                                              |
| <i>CHEK2</i> | Y72*        | Nonsense            | Germline            | Checkpoint                      | -                                              |
| <i>ERCC4</i> | V510Afs*9   | Frameshift deletion | Somatic             | Nucleotide Excision Repair      | -                                              |
| <i>ERCC5</i> | L878V       | Missense            | Somatic             | Nucleotide Excision Repair      | 0.97604                                        |

|               |             |                      |          |                                 |         |
|---------------|-------------|----------------------|----------|---------------------------------|---------|
| <i>ERCC5</i>  | P925Lfs*57  | Frameshift deletion  | Somatic  | Nucleotide Excision Repair      |         |
| <i>FANCA</i>  | R880*       | Nonsense             | Somatic  | Fanconi Anemia                  | -       |
| <i>MLH1</i>   | E199Dfs*4   | Frameshift deletion  | Somatic  | Mismatch Repair                 | -       |
| <i>MLH1</i>   | G221*       | Nonsense             | Somatic  | Mismatch Repair                 | -       |
| <i>MSH2</i>   | I794T       | Missense             | Somatic  | Mismatch Repair                 | 0.95504 |
| <i>MSH6</i>   | G652W       | Missense             | Somatic  | Mismatch Repair                 | 0.89919 |
| <i>MSH6</i>   | R911*       | Nonsense             | Germline | Mismatch Repair                 | -       |
| <i>MSH6</i>   | S280N       | Missense             | Somatic  | Mismatch Repair                 | 0.94347 |
| <i>MSH6</i>   | X152_splice | Splice variant       | Somatic  | Mismatch Repair                 | -       |
| <i>MUTYH</i>  | R56Gfs*21   | Frameshift deletion  | Germline | Base Excision Repair            | -       |
| <i>MUTYH</i>  | G382D       | Missense             | Germline | Base Excision Repair            | -       |
| <i>MUTYH</i>  | G382D       | Missense             | Germline | Base Excision Repair            | -       |
| <i>MUTYH</i>  | G382D       | Missense             | Germline | Base Excision Repair            | -       |
| <i>NBN</i>    | A713Gfs*29  | Frameshift insertion | Somatic  | Homologous Recombination Repair | -       |
| <i>NBN</i>    | G206Lfs*26  | Frameshift insertion | Somatic  | Homologous Recombination Repair | -       |
| <i>NBN</i>    | S240Cfs*8   | Frameshift deletion  | Somatic  | Homologous Recombination Repair | -       |
| <i>PALB2</i>  | R975S       | Missense             | Somatic  | Fanconi Anemia                  | 0.58485 |
| <i>PARP1</i>  | G61D        | Missense             | Somatic  | Base Excision Repair            | 0.84334 |
| <i>RAD50</i>  | R726C       | Missense             | Somatic  | Homologous Recombination Repair | 0.97082 |
| <i>RAD51C</i> | M1?         | Non-start            | Somatic  | Fanconi Anemia                  | -       |
| <i>RECQL4</i> | P466R       | Missense             | Somatic  | Homologous Recombination Repair | 0.96481 |
| <i>RECQL4</i> | X464        | Missense             | Germline | Homologous Recombination        | -       |

|                                                                                                       |  |  |  |        |  |
|-------------------------------------------------------------------------------------------------------|--|--|--|--------|--|
|                                                                                                       |  |  |  | Repair |  |
| Abbreviations: FATHMM-MKL; Functional Analysis Through Hidden Markov Models- Multiple Kernel Learning |  |  |  |        |  |

| Type of DDR alteration | N (available RECIST) | CR        | PR         | SD         | PD         |
|------------------------|----------------------|-----------|------------|------------|------------|
| Deleterious DDR        | 16                   | 2 (12.5%) | 4 (25%)    | 4 (25%)    | 6 (37.5%)  |
| Wild type and VUS DDR  | 78                   | 2 (2.6%)  | 22 (28.2%) | 34 (43.6%) | 20 (25.6%) |

Abbreviations: CR; Complete Response. DDR; DNA Damage Repair. I/O; Immune-Oncology. PR; Partial Response. PD; Progressive disease. RECIST; Response Evaluation Criteria in Solid Tumors. SD; Stable Disease. VUS; Variants of Unknown Significance.

| Type of DDR alteration | N (available RECIST) | CR       | PR         | SD         | PD        |
|------------------------|----------------------|----------|------------|------------|-----------|
| Deleterious DDR        | 18                   | 0 (0%)   | 6 (33.3%)  | 9 (50%)    | 3 (16.7%) |
| Wild type and VUS DDR  | 67                   | 3 (4.5%) | 28 (41.8%) | 31 (46.2%) | 5 (7.5%)  |

Abbreviations: CR; Complete Response. DDR; DNA Damage Repair. PR; Partial Response. PD; Progressive disease. RECIST; Response Evaluation Criteria in Solid Tumors. SD; Stable Disease. TKI; Tyrosine Kinase Inhibitor. VUS; Variants of Unknown Significance. VEGF; Vascular Endothelial Growth Factor.

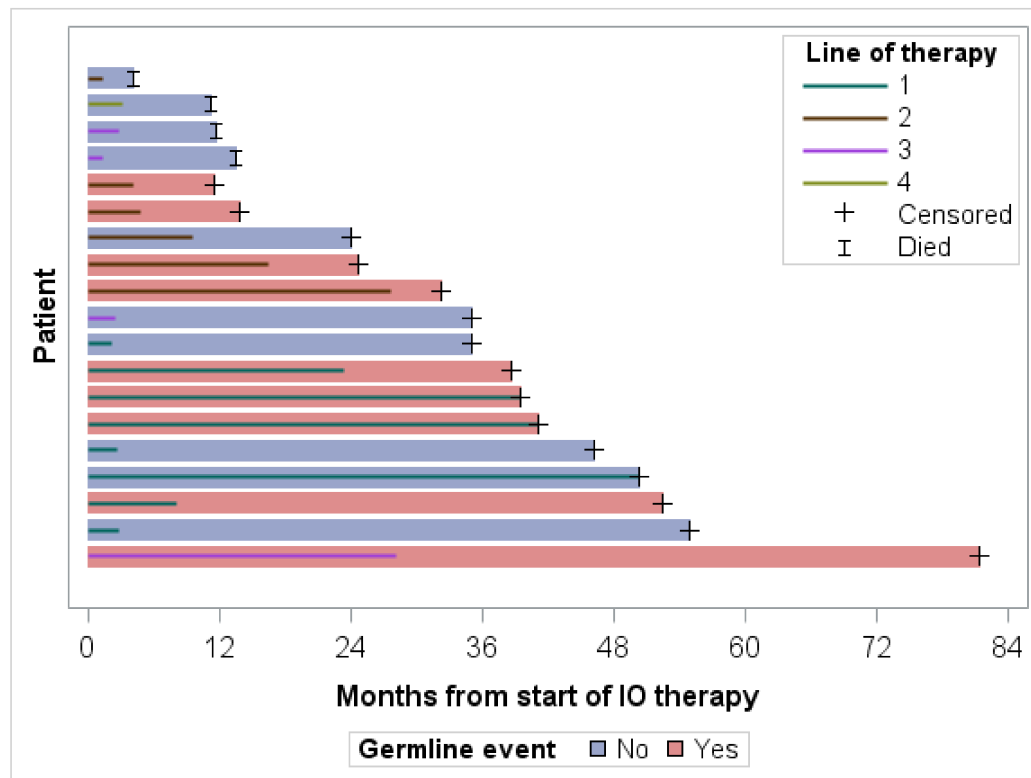

**Figure S1. Swimmer's Plot depicting the time course of therapy for 19 patients with deleterious DDR alteration in the I/O therapy cohort.**

Abbreviations: DDR; DNA Damage Repair. I/O; Immune-Oncology.



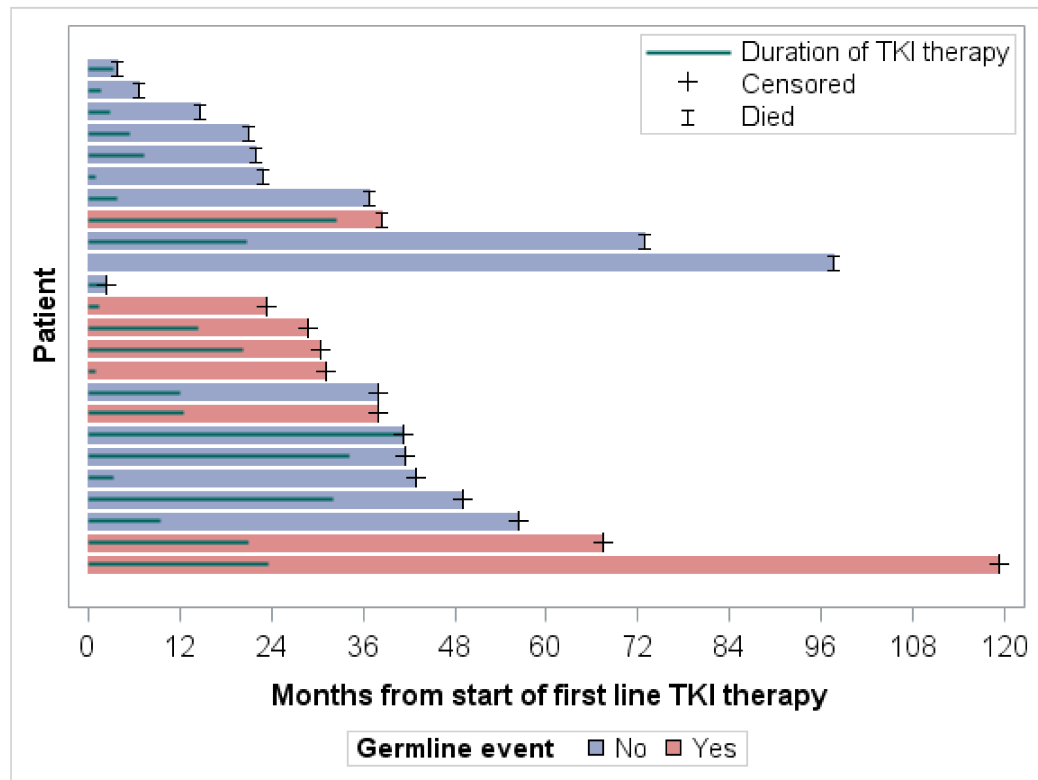

**Figure S2. Swimmer's Plot depicting the time course of therapy for 24 patients with deleterious DDR alteration in the TKI therapy cohort.**

Abbreviations: DDR; DNA Damage Repair. TKI; Tyrosine Kinase.

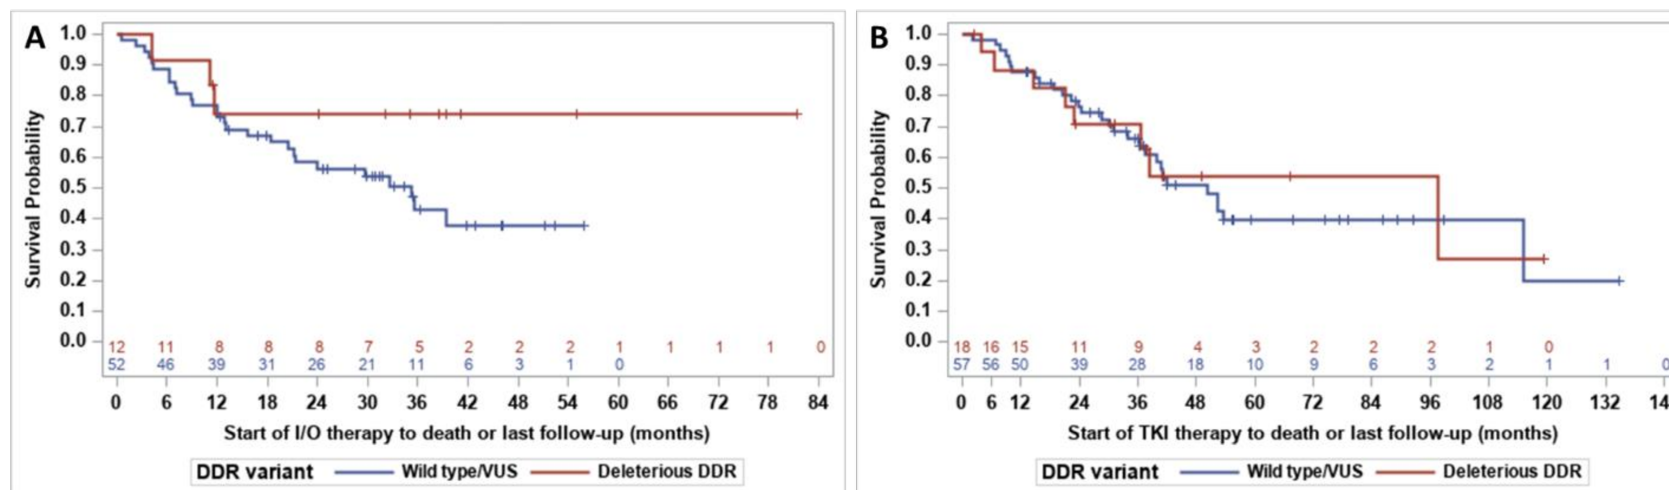

**Figure S3. Kaplan-Meier estimate of OS in patients who underwent NGS of the primary tumor in (A) I/O-treated patients and (B) VEGF-TKI treated patients**

Abbreviations: NGS; Next Generation Sequencing. I/O; Immune-Oncology. OS; Overall survival. VEGF; Vascular Endothelial Growth Factor. TKI; Tyrosine Kinase Inhibitor.

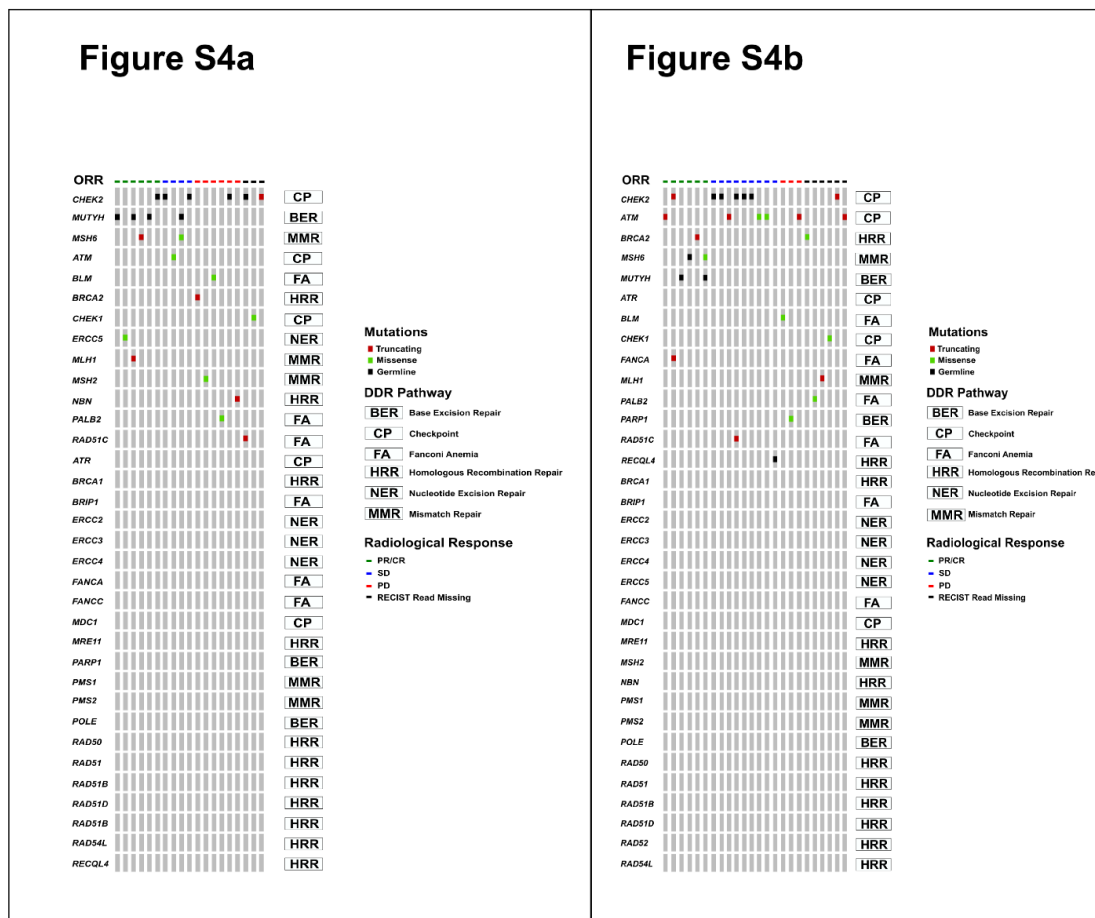

**Figure S4. Co-mutation plot of deleterious DDR gene alterations and relevant pathways in the I/O (A) and TKI analysis (B) with the associated radiological responses. Each column represents an individual patient.** Abbreviations: CR; Complete Response. DDR; DNA Damage Repair. I/O; Immune-Oncology. ORR; Objective Response Rate. PR; Partial Response. PD; Progressive Disease. RECIST; Response Evaluation Criteria in Solid Tumors. SD; Stable Disease. TKI; Tyrosine Kinase Inhibitor.

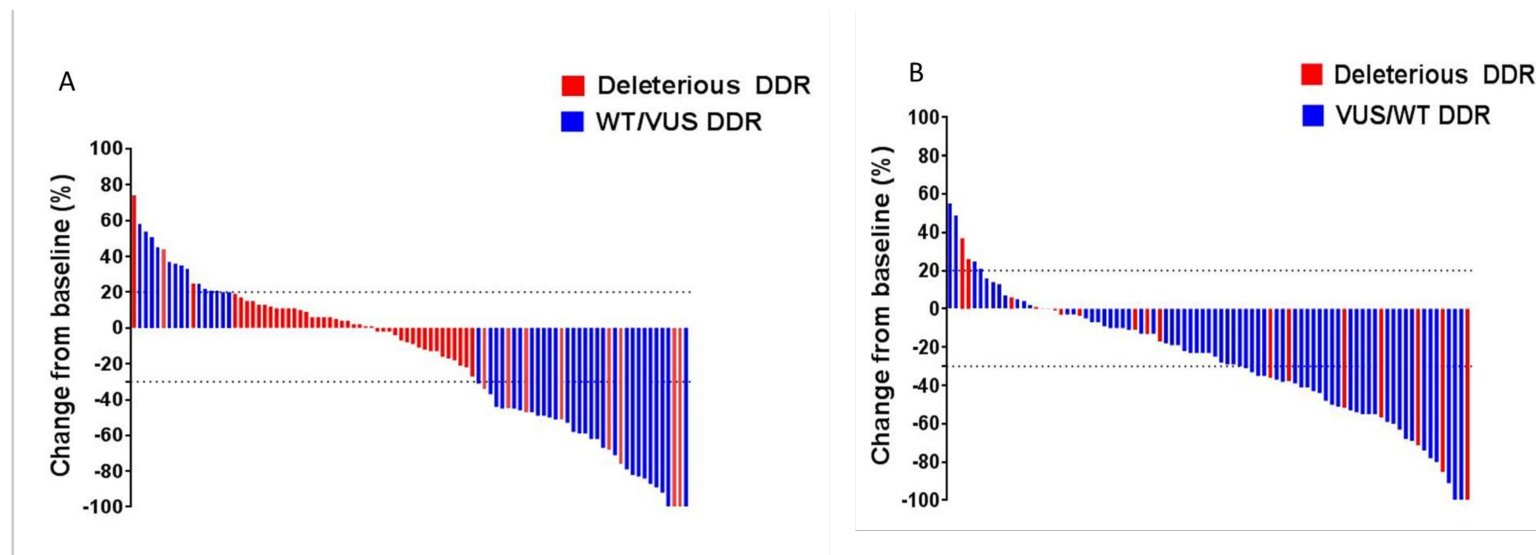

**Figure S5. Waterfall Plot of ORR in patients treated with I/O (A) and VEGF-TKI (B) by underlying DDR gene alterations (Deleterious DDR vs. Wild type/VUS DDR).** Abbreviations: DDR; DNA Damage Repair. I/O; Immune-Oncology. ORR; Objective Response Rate. TKI; Tyrosine Kinase Inhibitor. VEGF; Vascular Endothelial Growth Factor. VUS; Variants of Unknown Significance.
